# Supplementary material for: Sensitization of Gram-Negative Bacteria to Aminoglycosides with 2-Aminoimidazole Adjuvants
Source: MDPI journal article supplement (doi:10.3390/antibiotics12111563), 2023-10-25
Supplement: s1 [file s1]

# Sensitization of Gram-Negative Bacteria to Aminoglycosides with 2-aminoimidazole Adjuvants

Ashley N. Crotteau, Veronica B. Hubble, Santiana A. Marrujo, Anne E. Mattingly, Roberta J. Melander, and Christian Melander\*

Department of Chemistry and Biochemistry, University of Notre Dame, Notre Dame, IN 46556, USA; acrottea@nd.edu (A.C.)

\*Correspondence: cmelande@nd.edu

## Table of Contents

|                                                                                                                   |   |
|-------------------------------------------------------------------------------------------------------------------|---|
| Biological Data.....                                                                                              | 2 |
| Table S1. Minimum inhibitory concentration data of initial compounds tested against AB5075 and AB19606. ....      | 2 |
| Figure S1. Structures of additional analogs tested in combination with TOB against <i>A. baumannii</i> . ....     | 2 |
| Table S2. Additional compound MICs against AB5075 and AB19606.....                                                | 3 |
| Table S3. TOB MICs in combination with all additional analogs against AB5075 and AB19606.....                     | 5 |
| Table S4. Compound MICs against a panel of <i>K. pneumoniae</i> and <i>E. coli</i> strains.....                   | 6 |
| Table S5. TOB MICs in the presence of 20 mM MgCl <sub>2</sub> .....                                               | 6 |
| Table S6. Tobramycin MICs in (TOB only) evolved AB5075.....                                                       | 6 |
| Table S7. TOB potentiation in the presence and absence of compound 1 in AB5075 serially passaged in TOB + 1. .... | 7 |

## Biological Data

**Table S1.** Minimum inhibitory concentration data of initial compounds tested against AB5075 and AB19606.

| Compound | MIC ( $\mu\text{M}$ ) against AB5075 | MIC ( $\mu\text{M}$ ) against AB19606 |
|----------|--------------------------------------|---------------------------------------|
| <b>1</b> | 100                                  | 100                                   |
| <b>2</b> | 100                                  | 100                                   |
| <b>3</b> | 50                                   | 100                                   |
| <b>4</b> | >200                                 | >200                                  |
| <b>5</b> | 25                                   | 50                                    |

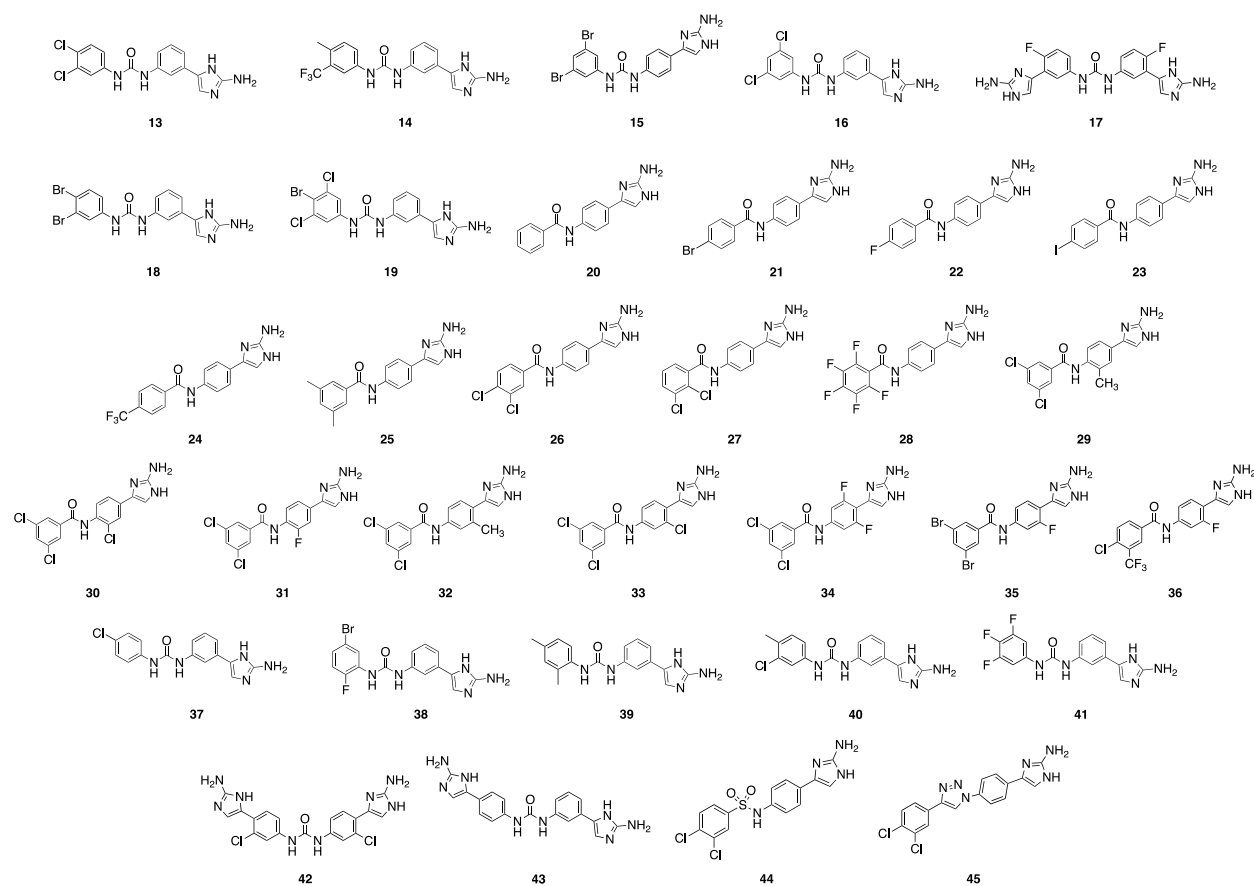

**Figure S1.** Structures of additional analogs tested in combination with TOB against *A. baumannii*.

**Table S2.** Additional compound MICs against AB5075 and AB19606.

| Compound | MIC ( $\mu$ M) against AB5075 | MIC ( $\mu$ M) against AB19606 |
|----------|-------------------------------|--------------------------------|
| 6        | 200                           | 100                            |
| 7        | 100                           | 50                             |
| 8        | 200                           | 200                            |
| 9        | 100                           | >200                           |
| 10       | 100                           | >200                           |
| 11       | 200                           | 100                            |
| 12       | 200                           | 200                            |
| 13       | 100                           | 100                            |
| 14       | >200                          | >200                           |
| 15       | 50                            | 50                             |
| 16       | 200                           | 100                            |
| 17       | >200                          | >200                           |
| 18       | 100                           | 50                             |
| 19       | >200                          | 100                            |
| 20       | >200                          | >200                           |
| 21       | >200                          | >200                           |
| 22       | >200                          | >200                           |
| 23       | >200                          | >200                           |
| 24       | >200                          | >200                           |
| 25       | >200                          | >200                           |
| 26       | 100                           | 50                             |
| 27       | >200                          | >200                           |
| 28       | >200                          | >200                           |
| 39       | >200                          | >200                           |
| 30       | >200                          | >200                           |
| 31       | >200                          | >200                           |
| 32       | >200                          | >200                           |
| 33       | >200                          | >200                           |
| 34       | >200                          | >200                           |
| 35       | >200                          | >200                           |
| 36       | 50                            | 50                             |
| 37       | >200                          | >200                           |
| 38       | 200                           | 100                            |
| 39       | >200                          | >200                           |
| 40       | >200                          | >200                           |
| 41       | 100                           | 200                            |

|    |      |      |
|----|------|------|
| 42 | >200 | >200 |
| 43 | >200 | >200 |
| 44 | >200 | >200 |
| 45 | >200 | >200 |

**Table S3.** TOB MICs in combination with all additional analogs against AB5075 and AB19606.

| Compound | AB5075                          |                                        | AB19606                         |                                        |
|----------|---------------------------------|----------------------------------------|---------------------------------|----------------------------------------|
|          | Concentration tested ( $\mu$ M) | TOB MIC ( $\mu$ g/mL) [fold-reduction] | Concentration tested ( $\mu$ M) | TOB MIC ( $\mu$ g/mL) [fold-reduction] |
|          |                                 | 128                                    |                                 | 4                                      |
| 13       | 30                              | 16 [8]                                 | 30                              | 1 [4]                                  |
| 14       | 60                              | 16 [8]                                 | 60                              | 2 [2]                                  |
| 15       | 15                              | 8 [16]                                 | 15                              | 2 [2]                                  |
| 16       | 60                              | 8 [16]                                 | 30                              | 1 [4]                                  |
| 17       | 10                              | 128 [0]                                | 10                              | 2 [2]                                  |
| 18       | 30                              | 32 [4]                                 | 15                              | >4 [0]                                 |
| 19       | 60                              | 8 [16]                                 | 30                              | 0.5 [8]                                |
| 20       | 60                              | 128 [0]                                | 60                              | >4 [0]                                 |
| 21       | 60                              | 64 [2]                                 | 60                              | 2 [2]                                  |
| 22       | 60                              | 32 [4]                                 | 60                              | 4 [0]                                  |
| 23       | 60                              | 128 [0]                                | 60                              | >4 [0]                                 |
| 24       | 60                              | 128 [0]                                | 60                              | >4 [0]                                 |
| 25       | 60                              | 128 [0]                                | 60                              | 4 [0]                                  |
| 26       | 30                              | 64 [2]                                 | 15                              | 2 [2]                                  |
| 27       | 60                              | 64 [2]                                 | 60                              | >4 [0]                                 |
| 28       | 60                              | 128 [0]                                | 60                              | >4 [0]                                 |
| 29       | 60                              | 64 [2]                                 | 60                              | 2 [2]                                  |
| 30       | 60                              | 128 [0]                                | 60                              | >4 [0]                                 |
| 31       | 60                              | 128 [0]                                | 60                              | 4 [0]                                  |
| 32       | 60                              | 64 [2]                                 | 60                              | 1 [4]                                  |
| 33       | 60                              | 32 [4]                                 | 60                              | 1 [4]                                  |
| 34       | 60                              | 128 [0]                                | 60                              | 4 [0]                                  |
| 35       | 60                              | 32 [4]                                 | 60                              | 2 [2]                                  |
| 36       | 15                              | 128 [0]                                | 15                              | 2 [2]                                  |
| 37       | 60                              | 64 [2]                                 | 60                              | 4 [0]                                  |
| 38       | 60                              | 32 [4]                                 | 30                              | 4 [0]                                  |
| 39       | 60                              | 128 [0]                                | 60                              | >4 [0]                                 |
| 40       | 60                              | 64 [2]                                 | 60                              | >4 [0]                                 |
| 41       | 30                              | 32 [4]                                 | 60                              | 2 [2]                                  |
| 42       | 60                              | 128 [0]                                | 60                              | >4 [0]                                 |
| 43       | 60                              | 64 [2]                                 | 60                              | 2 [2]                                  |
| 44       | 60                              | 128 [0]                                | 60                              | 4 [0]                                  |
| 45       | 60                              | 128 [0]                                | 60                              | 4 [0]                                  |

**Table S4.** Compound MICs against a panel of *K. pneumoniae* and *E. coli* strains.

| Strain  | MIC of 1<br>( $\mu$ M) | MIC of 3<br>( $\mu$ M) | MIC of 5<br>( $\mu$ M) | MIC of 10<br>( $\mu$ M) | MIC of 11<br>( $\mu$ M) | MIC of 12<br>( $\mu$ M) |
|---------|------------------------|------------------------|------------------------|-------------------------|-------------------------|-------------------------|
| KP1705  | 50                     | 50                     | 50                     | 200                     | >200                    | >200                    |
| KP43816 | 50                     | 50                     | 50                     | 100                     | >200                    | *n.d.                   |
| EC197   | 12.5                   | 25                     | 25                     | 50                      | 200                     | 50                      |
| EC199   | 25                     | 25                     | 25                     | 50                      | >200                    | 50                      |

\*n.d. = not determined

**Table S5.** TOB MICs in the presence of 20 mM MgCl<sub>2</sub>.

| Compound | AB5075                             |                          |                                                    | AB19606                            |                          |                                                    |
|----------|------------------------------------|--------------------------|----------------------------------------------------|------------------------------------|--------------------------|----------------------------------------------------|
|          | Concentration<br>tested ( $\mu$ M) | TOB MIC<br>( $\mu$ g/mL) | TOB MIC ( $\mu$ g/mL) +<br>20 mM MgCl <sub>2</sub> | Concentration<br>tested ( $\mu$ M) | TOB MIC<br>( $\mu$ g/mL) | TOB MIC ( $\mu$ g/mL) +<br>20 mM MgCl <sub>2</sub> |
|          |                                    | 128                      | 512                                                |                                    | 4                        | 128                                                |
| <b>1</b> | 30                                 | 2                        | 128                                                |                                    |                          |                                                    |
| <b>3</b> |                                    |                          |                                                    | 30                                 | 0.5                      | 64                                                 |

**Table S6.** Tobramycin MICs in (TOB only) evolved AB5075.

| TOB ( $\mu$ g/mL) | TOB ( $\mu$ g/mL) + 1 (15 $\mu$ M) |
|-------------------|------------------------------------|
| 2048              | 2048                               |

**Table S7.** TOB potentiation in the presence and absence of compound **1** in AB5075 serially passaged in TOB + **1**.

|       | Concentration of compound <b>1</b> ( $\mu\text{M}$ ) | TOB MIC ( $\mu\text{g/mL}$ ) |
|-------|------------------------------------------------------|------------------------------|
| Day 0 | 0                                                    | 128                          |
|       | 15                                                   | 16                           |
| Day 2 | 0                                                    | 256                          |
|       | 15                                                   | 64                           |
| Day 4 | 0                                                    | 1024                         |
|       | 15                                                   | 512                          |
| Day 6 | 0                                                    | 1024                         |
|       | 15                                                   | 1024                         |
| Day 8 | 0                                                    | 2048                         |
|       | 15                                                   | 2048                         |
